# Supplementary material for: Associations between dietary micronutrient intake and molecular-Bacterial Vaginosis
Source: PubMed Central journal article supplement (PMC6806504; doi:10.1186/s12978-019-0814-6), 2019-10-22
Supplement: 12978_2019_814_MOESM2_ESM.pdf [file 12978_2019_814_MOESM2_ESM.pdf]

# NutritionQuest

Block Brief 2000 FFQ ©

## DIET ANALYSIS OUTPUT VARIABLES

|           |                                            |
|-----------|--------------------------------------------|
| DT_KCAL   | CALORIES (Kcal)                            |
| DT_PROT   | PROTEIN (g)                                |
| DT_TFAT   | TOTAL FAT (g)                              |
| DT_CARB   | CARBOHYDRATE (g)                           |
| DT_CALC   | CALCIUM (mg)                               |
| DT_PHOS   | PHOSPHORUS (mg)                            |
| DT_IRON   | IRON (mg)                                  |
| DT_SODI   | SODIUM (mg)                                |
| DT_POTA   | POTASSIUM (mg)                             |
| DT_A_IU   | VITAMIN A (IU)                             |
| DT_A_RE   | VITAMIN A (RE)                             |
| DT_THIA   | THIAMIN (B1) (mg)                          |
| DT_RIBO   | RIBOFLAVIN (B2) (mg)                       |
| DT_NIAC   | NIACIN (mg)                                |
| DT_VITC   | VITAMIN C (mg)                             |
| DT_SFAT   | SATURATED FAT (g)                          |
| DT_MFAT   | MONOUNSATURATED FAT (g)                    |
| DT_PFAT   | POLYUNSATURATED FAT (g)                    |
| DT_CHOL   | CHOLESTEROL (mg)                           |
| DT_FIBE   | FIBER Total dietary fiber (g)              |
| DT_VitE   | VITAMIN E a-TE                             |
| DT_ZINC   | ZINC (mg)                                  |
| DT_AN_ZN  | ANIMAL ZINC, Zinc from animal sources (mg) |
| DT_VITB6  | VITAMIN B6 (mg)                            |
| DT_MAGN   | MAGNESIUM (mg)                             |
| DT_ACARO  | ALPHA-CAROTENE (ug)                        |
| DT_BCARO  | BETA-CAROTENE (ug)                         |
| DT_CRYPT  | CRYPTOXANTHIN (carotenoid) (ug)            |
| DT_LUTZE  | LUTEIN (carotenoid) (ug)                   |
| DT_LYCO   | LYCOPENE (carotenoid) (ug)                 |
| DT_Ret    | RETINOL (preformed Vit. A, ug)             |
| DT_ProA   | CAROTENE Provitamin A carotenoids (ug)     |
| Genisten  | GENISTEIN Genistein (ug)                   |
| Daidzen   | DAIDZEIN Daidzein (ug)                     |
| DT_caffn  | CAFFEINE (mg)                              |
| DT_vitK   | VITAMIN K (ug)                             |
| DT_VB12   | VITAMIN B12 (ug)                           |
| DT_CYSTEN | CYSTEINE (mg)                              |
| DT_METHI  | METHIONINE (mg)                            |

|             |                                                    |
|-------------|----------------------------------------------------|
| MeatIron    | Iron from Meat (mg)                                |
| DT_HEME     | Heme iron (mg)                                     |
| GL          | Glycemic Load (glucose), average daily             |
| GI          | Glycemic Index (glucose), average daily            |
| DT_FOLFD    | Total folate (natural + synthetic), mcg            |
| DT_FOLAC    | Folic acid, from food fortification, mcg'          |
| DT_FDFOL    | Naturally occurring folate in food, mcg            |
| FOL_DFE     | DFE, Average daily Dietary Folate Equivalents, mcg |
| DT_VITD     | Dietary vitamin D, (IU)                            |
| DT_SEL      | Selenium, mcg                                      |
| DT_TRFAT    | Trans fats, total, gms                             |
| DT_SUG_T    | Sugars, total, gms                                 |
| DT_ARGININE | Dietary arginine, mg                               |
| DT_COPP     | Copper, mg                                         |
| DT_FA182    | Dietary PUFA (~N-6) 18:2, gms                      |
| DT_FA183    | Dietary PUFA (~N-3) 18:3, gms                      |
| DT_FA184    | Dietary PUFA (~N-3) 18:4, gms                      |
| DT_FA204    | Dietary PUFA (~N-6) 20:4, gms                      |
| DT_FA205    | Dietary N-3 PUFA 20:5 (EPA), gms                   |
| DT_FA225    | Dietary N-3 PUFA 22:5 (DPA), gms                   |
| DT_FA226    | Dietary N-3 PUFA 22:6 (DHA), gms                   |
| DT_TOTN6    | Omega-6 FA, gms                                    |
| DT_TOTN3    | Omega-3 FA, gms                                    |
| DT_ALCO     | alcohol (ethanol), gms                             |
| DT_THEO     | Theobromine,                                       |
| Betaine     | Betaine, mg                                        |
| Tcholine    | Total choline, mg                                  |

|                              |                                                  |
|------------------------------|--------------------------------------------------|
| GROUP_SOLID_COUNT            | # of solid foods respondent reported ever eating |
| GROUP_SOLID_TOTAL_FREQUENCY  | Frequency of all solid foods                     |
| GROUP_SOLID_TOTAL_GRAMS      | Grams of solid food (g) PER DAY                  |
| GROUP_SUGARYBEVG_TOTAL_GRAMS | Sugary beverages, gms                            |
| GROUP_SUGARYBEVG_TOTAL_KCAL  | Kilocalories from sugary beverages               |

### Percent of Calories

|          |                                    |
|----------|------------------------------------|
| PCTFAT   | % of Kcal from fat                 |
| PCTPROT  | % of Kcal from protein             |
| PCTCARB  | % of Kcal from carbohydrate        |
| PCTSWEET | % of Kcal from sweets, desserts    |
| PCTALCH  | % of Kcal from alcoholic beverages |

### Percent of Calories, excluding alcoholic beverages calories from denominator

|          |                                                            |
|----------|------------------------------------------------------------|
| BA_PFAT  | % fat cals, alcoholic beverages excluded from denominator  |
| BA_PPROT | % prot cals, alcoholic beverages excluded from denominator |
| BA_PCARB | % carb cals, alcoholic beverages excluded from denominator |

### Fiber from different sources

|                                       |                               |
|---------------------------------------|-------------------------------|
| GROUP_BEANFIBER_TOTAL_FIBE            | Fiber from beans (g)          |
| GROUP_VEGETABLESFRUITFIBER_TOTAL_FIBE | Fiber from veg & fruit (g)    |
| GROUP_GRAINFIBER_TOTAL_FIBE           | Dietary fiber from grains (g) |

### FOOD GROUPS (Approximations of Pyramid food groups, pre-2006 serving sizes)

|          |                                             |
|----------|---------------------------------------------|
| VEGSRV   | Daily servings of vegetables                |
| FRUITSRV | Daily frequency of fruits & fruit juices    |
| GRAINSRV | Daily svgs breads, cereals, rice, pasta     |
| MEATSRV  | Daily svgs meat, fish, poultry, beans, eggs |
| DAIRYSRV | Daily servings of milk, yogurt, cheese      |
| FATSRV   | Daily svgs fats & oils, sweets, sodas       |

### Nutrients from vitamin supplements

|          |                                           |
|----------|-------------------------------------------|
| SUP_VITA | Average daily Vit A from supplements (IU) |
| SUP_VITC | Vit C (mg)                                |
| SUP_VITD | Vit D (IU)                                |
| SUP_VITE | Vit E (a-TE)                              |
| SUP_IRON | IRON (mg)                                 |
| SUP_CA   | CALCIUM (mg)                              |
| SUP_ZINC | ZINC (mg)                                 |
| SUP_BCAR | beta-car (ug)                             |
| SUP_B1   | B1 (mg)                                   |
| SUP_B6   | B6 (mg)                                   |
| SUP_B12  | B12 (ug)                                  |
| SUP_FOL  | FOLATE (mcg)                              |
| SUP_CU   | COPPER (mg)                               |
| SUP_SE   | SELENIUM (mcg)                            |
| SUP_B2   | B2 (mg)                                   |
| SUP_MG   | MAGNESIUM (mg)                            |
| SUP_NIAC | NIACIN (mg)                               |
